# Supplementary material for: A new entry towards diastereomeric C1,C2,C3-functionalized [3]ferrocenophanes using a solid state mediated double 1,4-Michael addition type ring closing approach
Source: Royal Society of Chemistry journal article supplement (doi:10.1039/d3nj04862d), 2023-01-01
Supplement: d3nj04862d1.pdf [file d3nj04862d1.pdf]

## Table of Contents

**A new entry towards diastereomeric C<sup>1</sup>,C<sup>2</sup>,C<sup>3</sup>- functionalized [3]ferrocenophanes using a solid state mediated double 1,4-Michael addition type ring closing approach.**

Biplob Halder<sup>a</sup>, Tulasi Barik<sup>a</sup>, Saurav Chatterjee <sup>\*a</sup>

*<sup>a</sup>Department of Chemistry, National Institute of Technology Rourkela, Odisha-769008, India.*

**Figure S1: <sup>1</sup>H NMR of Compound 4**

**Figure S2: <sup>13</sup>C NMR of Compound 4**

**Figure S3: HRMS of Compound 4**

**Figure S4: <sup>1</sup>H NMR of Compound 5**

**Figure S5: <sup>13</sup>C NMR of Compound 5**

**Figure S6: HRMS of Compound 5**

**Figure S7: <sup>1</sup>H NMR of Compound 6**

**Figure S8: <sup>13</sup>C NMR of Compound 6**

**Figure S9: DEPT-90 NMR of Compound 6**

**Figure S10: DEPT-135 NMR of Compound 6**

**Figure S11: HRMS of Compound 6**

**Figure S12: UV-Visible Spectra of 4-6**

**Figure S13: Chiral HPLC of 6 showing 1R,3R and 1S,3S enantiomers**

**Figure S14 : Optimized geometry of 6 (-48622.268518209 eV), 4 (-48622.287660337 eV) and 5 (-48622.207742644 eV)**

**Figure S15: DPV and CV of 6 on gradual addition of Picric acid (PA)**

**Figure S16: DPV of 6 on gradual addition of dinitrotoluene (DNT) and dinitrophenol (DNP)**

**Figure S17: Calculation of LOD using DPV data [6.PA]**

**Figure S18: Calculation of LOD using UV-Visible data of [6.PA]**

**Figure S19: HOMO and LUMO for 6 and [6.PA]**

**Figure S20 : EDS of Redmud used**

**Figure S21: Benesi-Hildebrand plot (397 nm absorbance) of 6 assuming 1:2 stoichiometry for the association between 6 and [PA].**

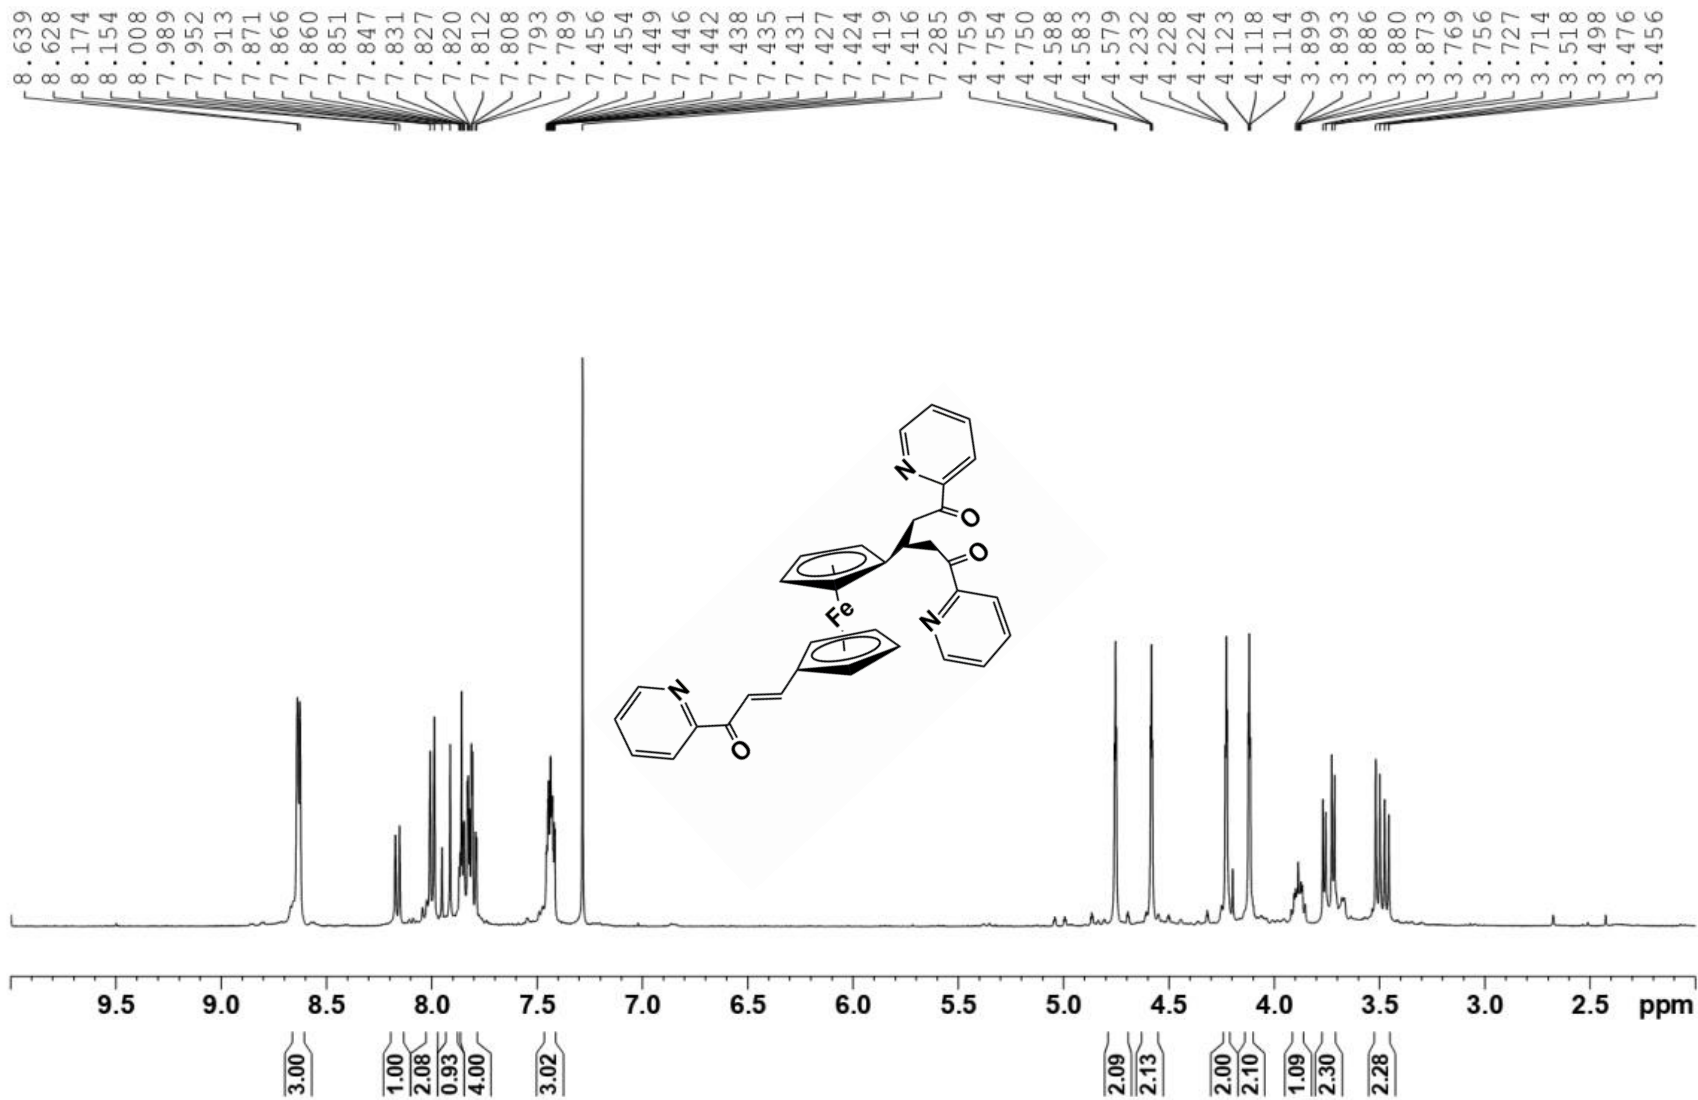

Figure S1:  $^1\text{H}$  NMR of compound 4 ( $\text{CDCl}_3$ , 400 MHz)

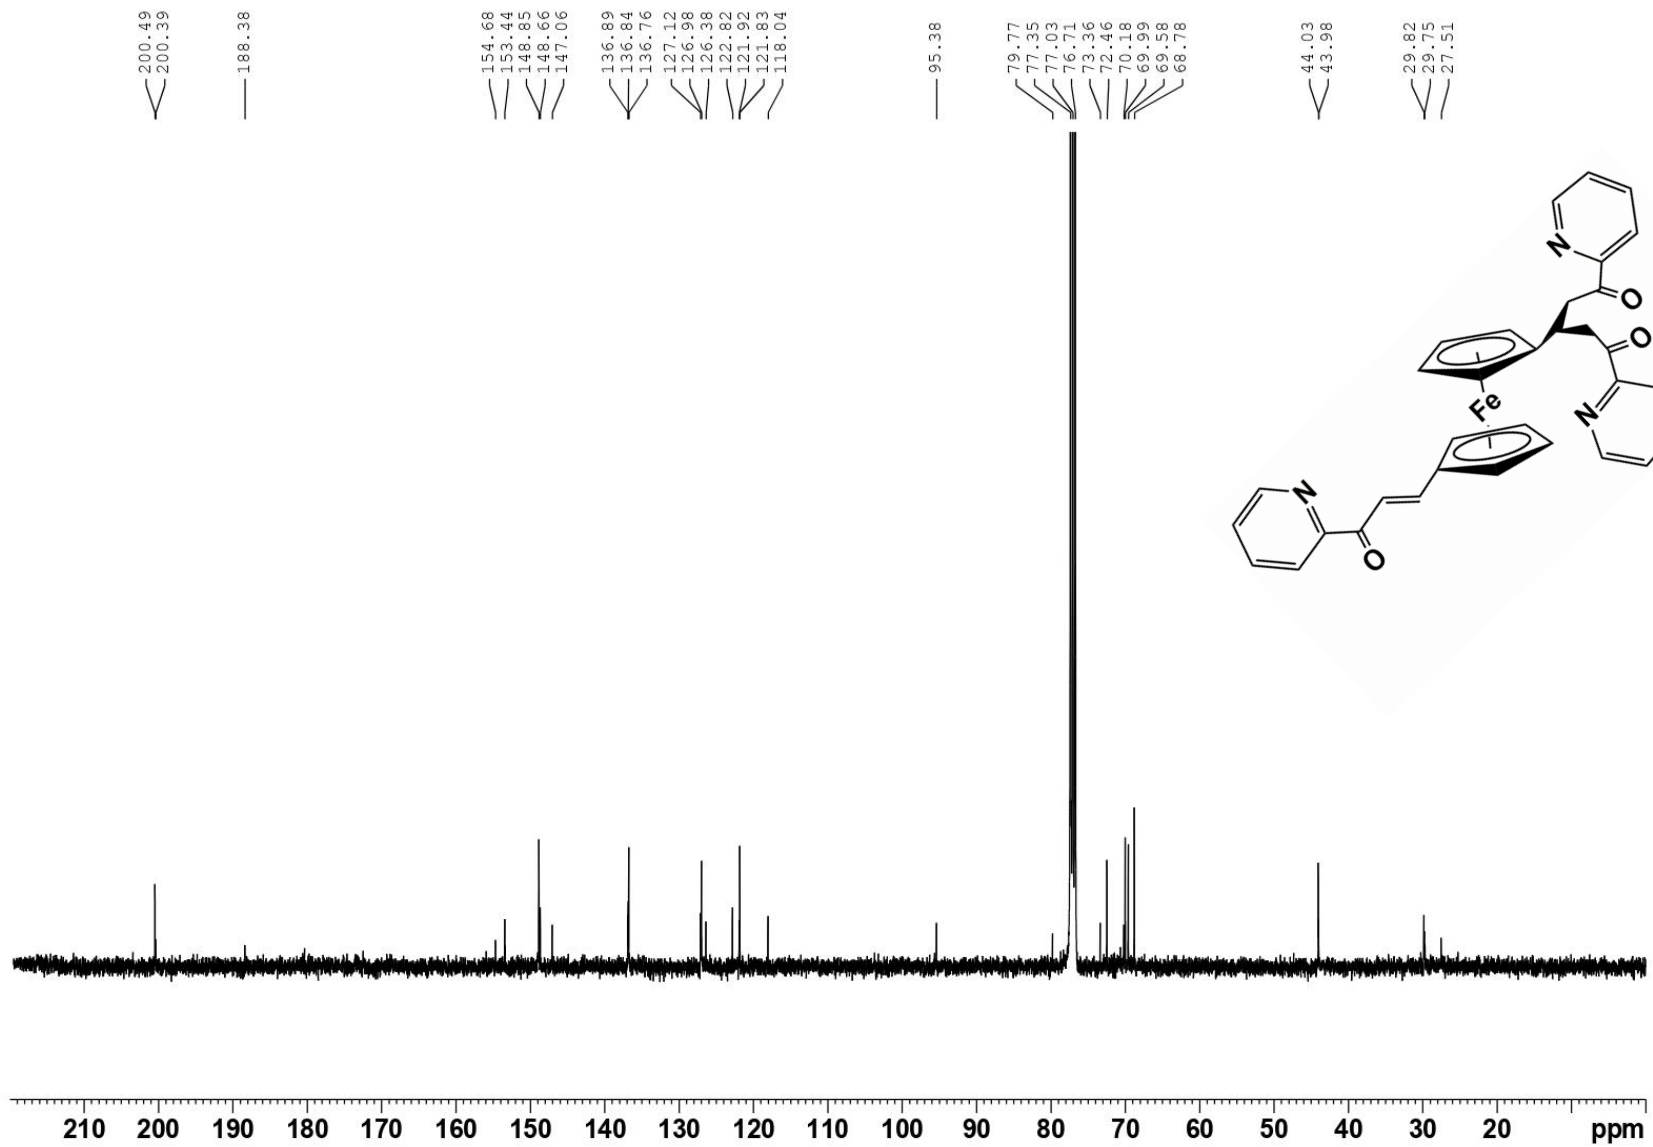

Figure S2:  $^{13}\text{C}$  NMR of compound 4 ( $\text{CDCl}_3$ , 100 MHz)

SC  
SC-FC-L-BL 2 (0.062) Cm (2:7)  
569.1190

NIT Rourkela

1: TOF MS ES+  
1.66e7

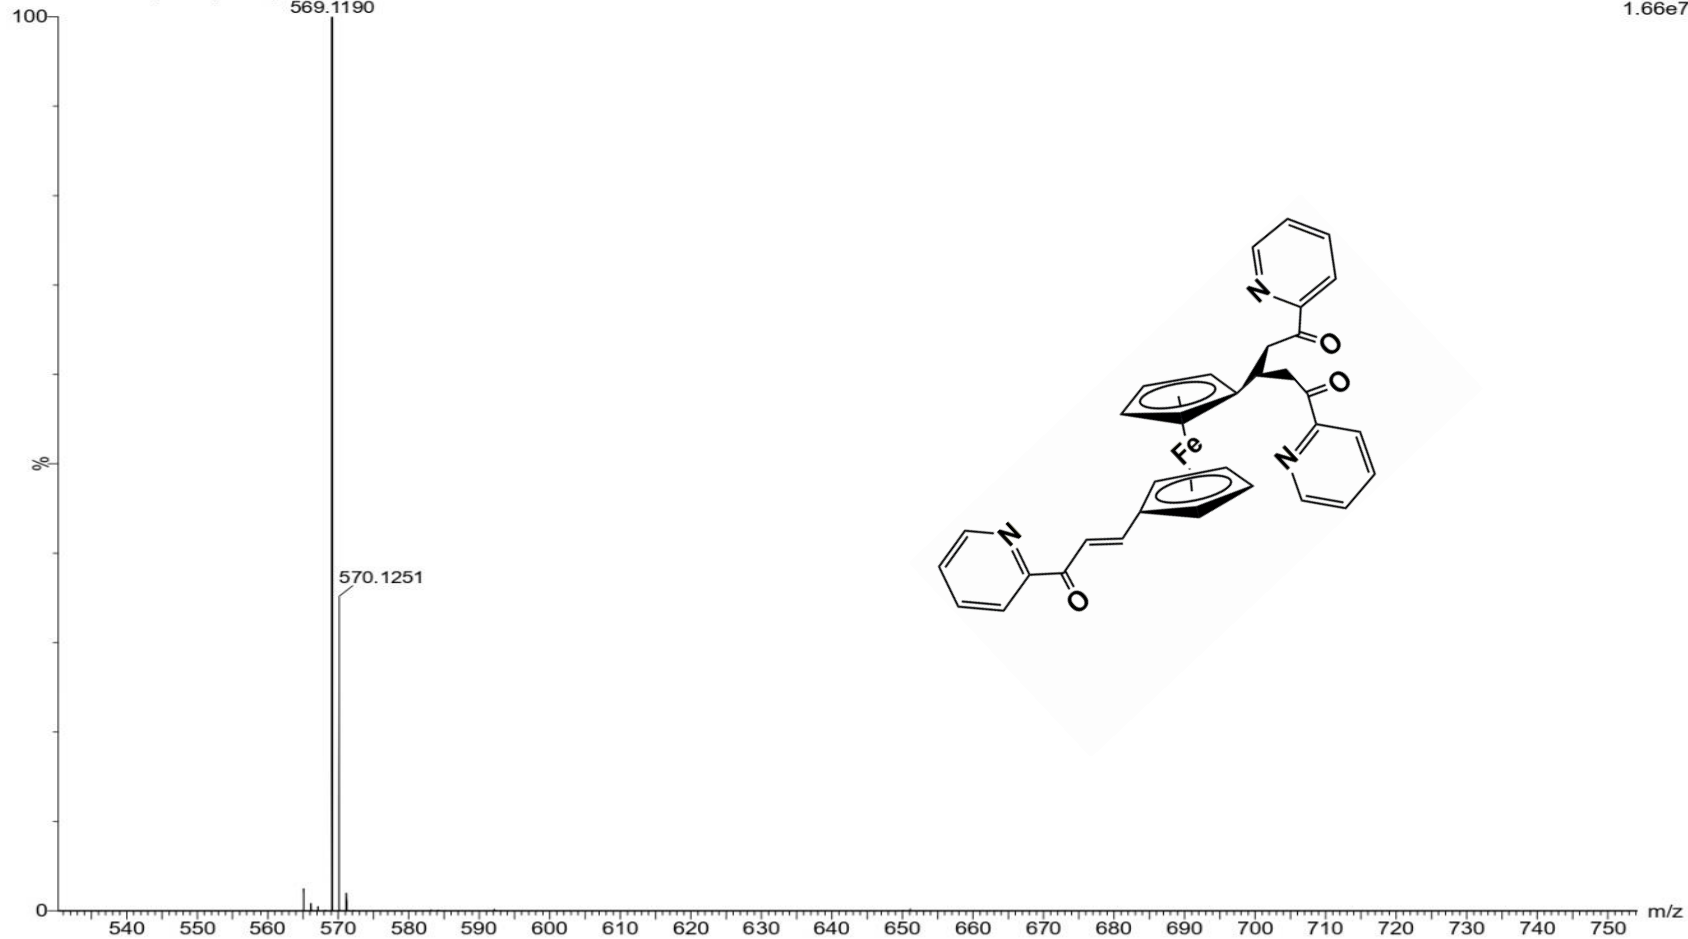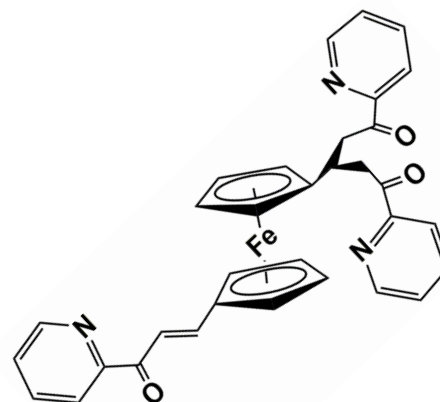

**Figure S3: HRMS of compound 4. (100 pmol/ $\mu$ L in MeCN (positive ion mode)).**

Chemical formula:  $C_{33}H_{27}FeN_3O_3$ , Mol. Wt: 569.43 ; Observed m/z = 569.1190,  $[M]^+$ , 570.1251  $[M + H]^+$  .

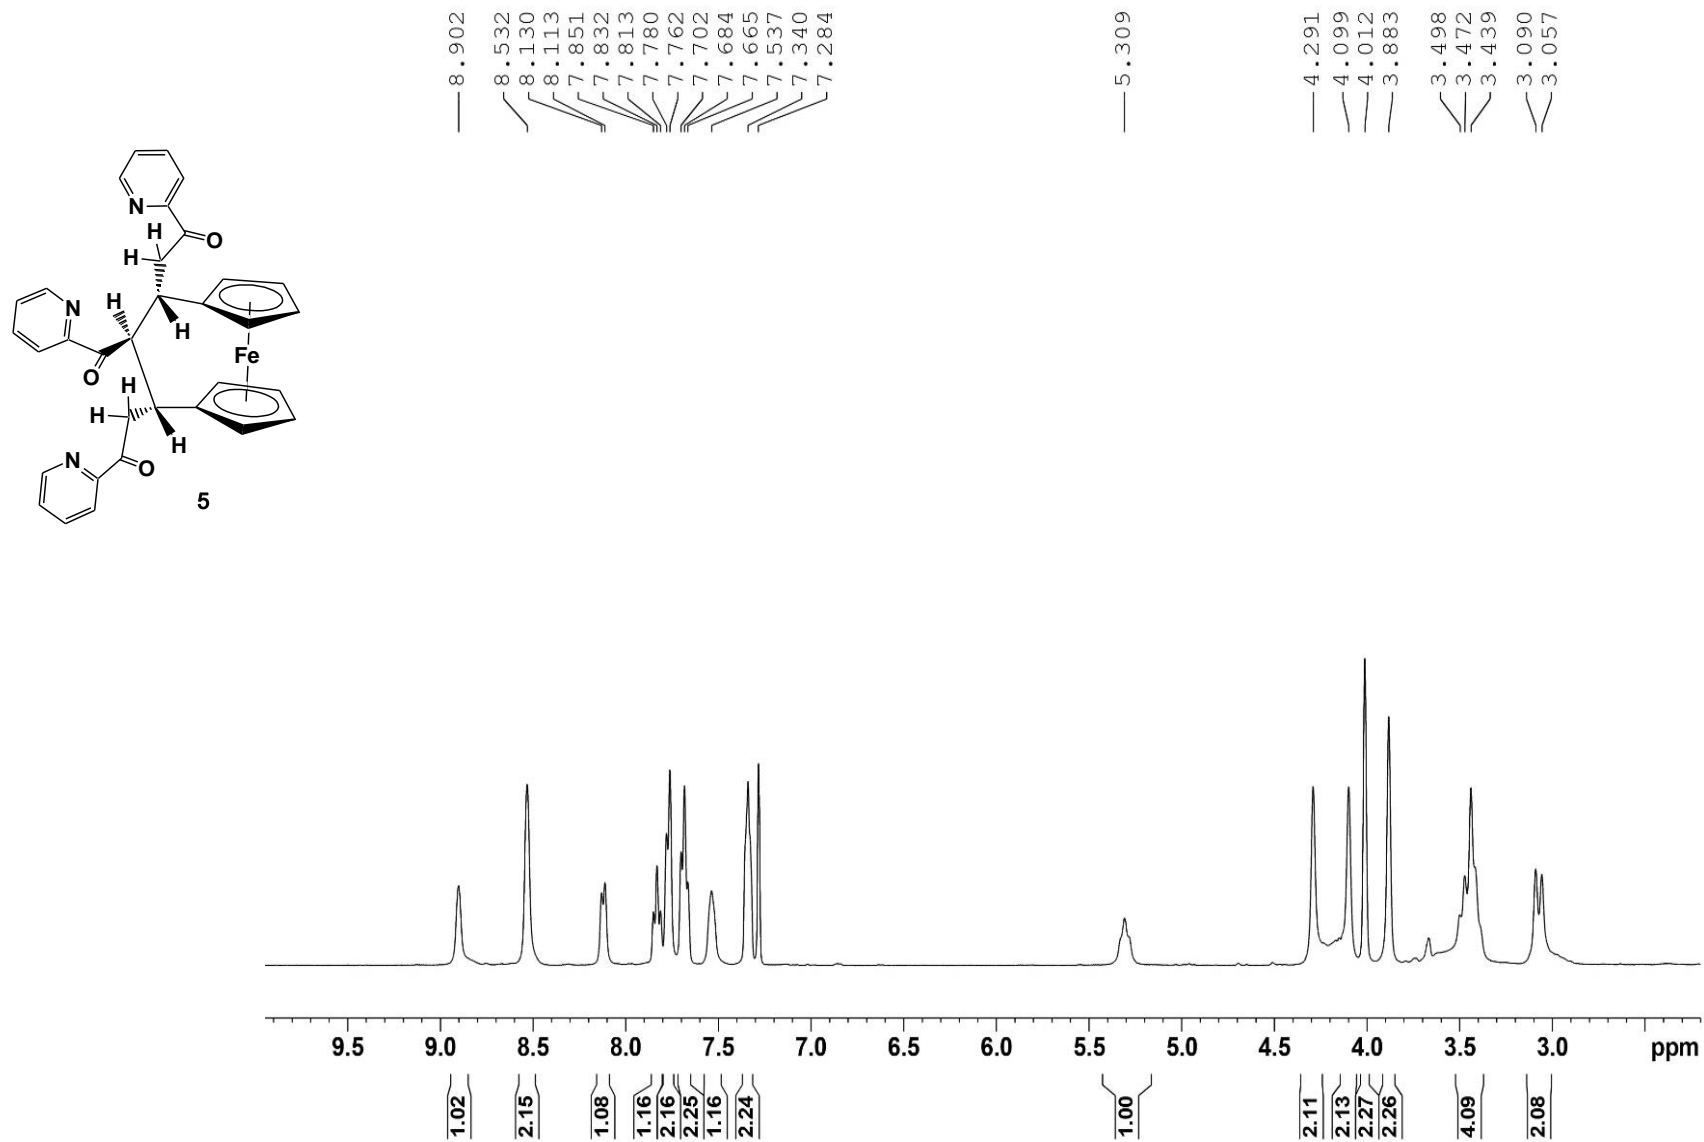

Figure S4:  $^1\text{H}$  NMR of compound 5 ( $\text{CDCl}_3$ , 400 MHz)

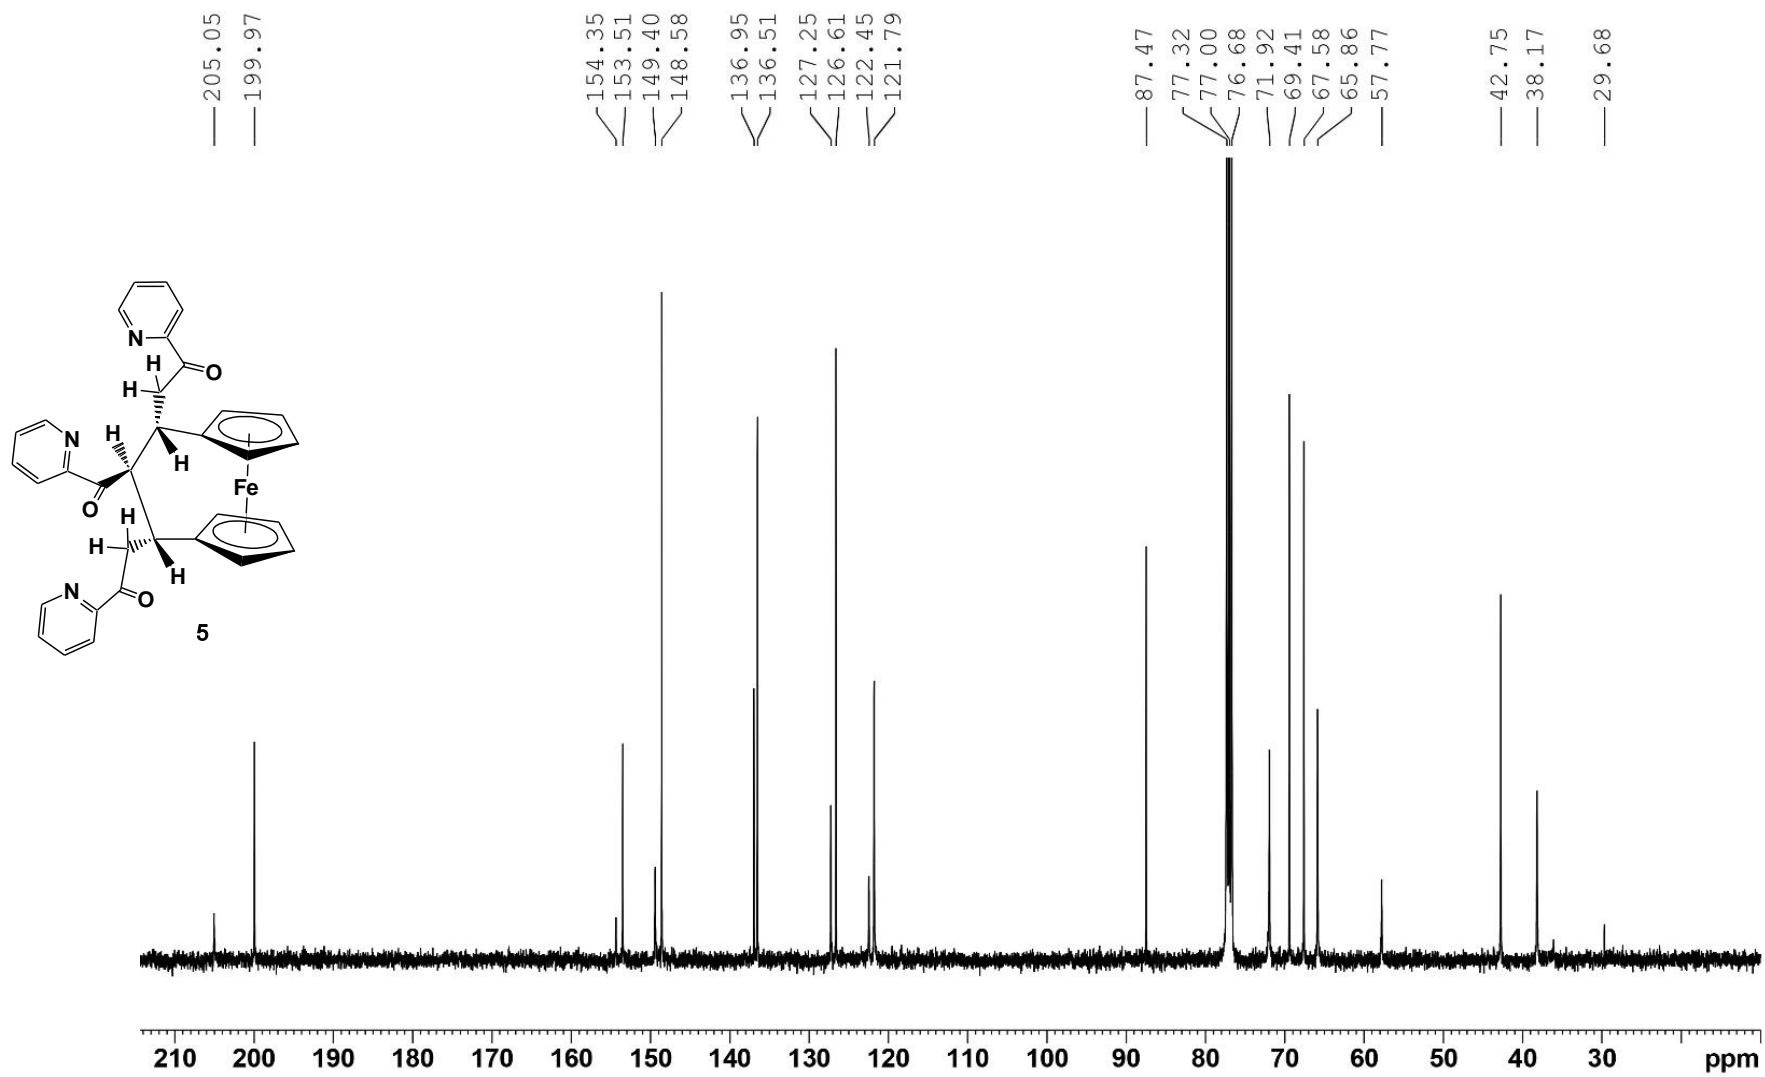

Figure S5:  $^{13}\text{C}$  NMR of compound 5 (CDCl<sub>3</sub>, 100 MHz)

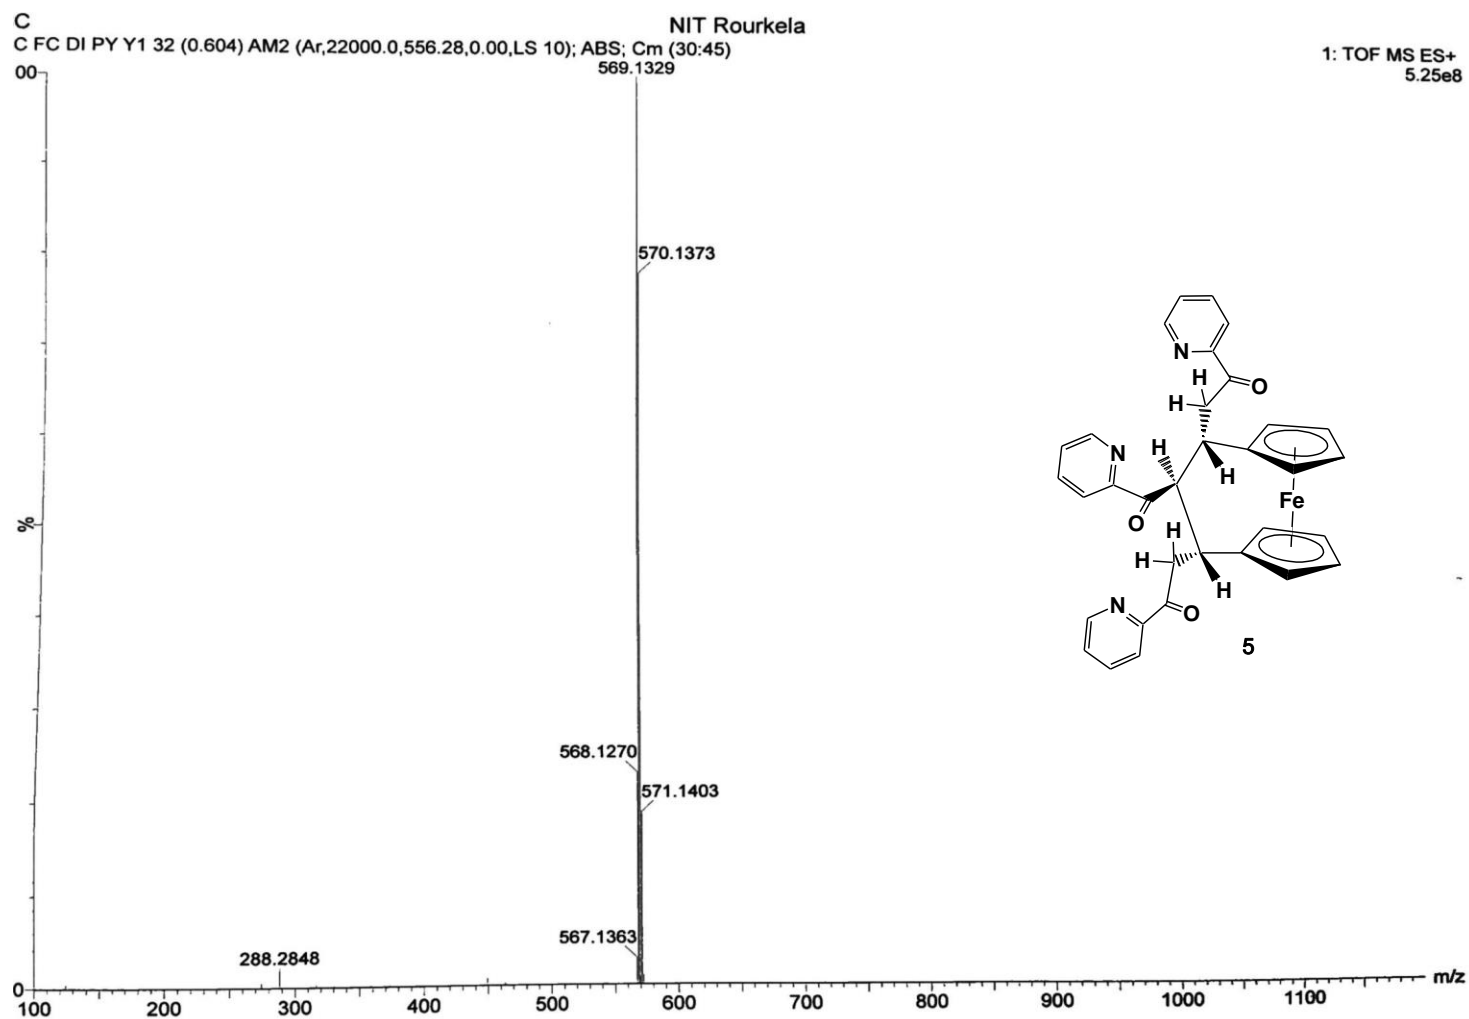

**Figure S6: HRMS of compound 5. (100 pmol/ $\mu$ L in MeCN (positive ion mode).**

Chemical formula:  $C_{33}H_{27}FeN_3O_3$ , Mol. Wt: 569.43 ; Observed  $m/z = 569.1329 [M]^+$ ,  $570.1373 [M + H]^+$  .



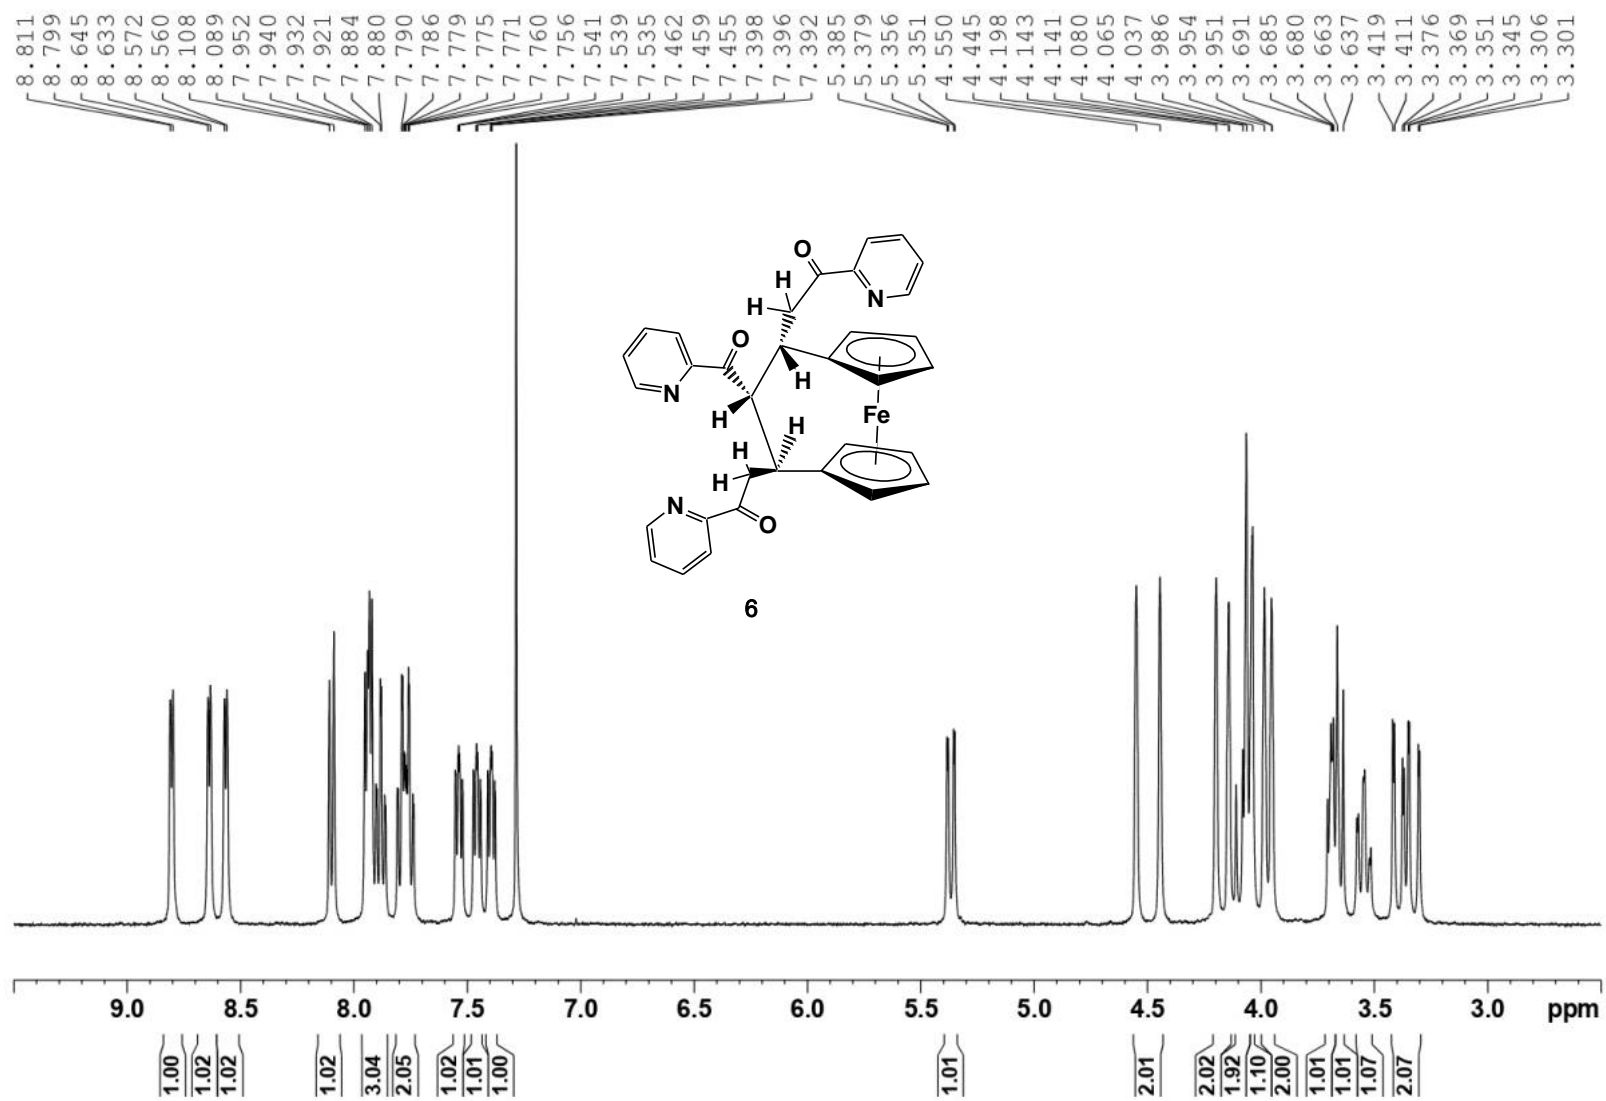

Figure S7:  $^1\text{H}$  NMR of compound 6 ( $\text{CDCl}_3$ , 400 MHz)

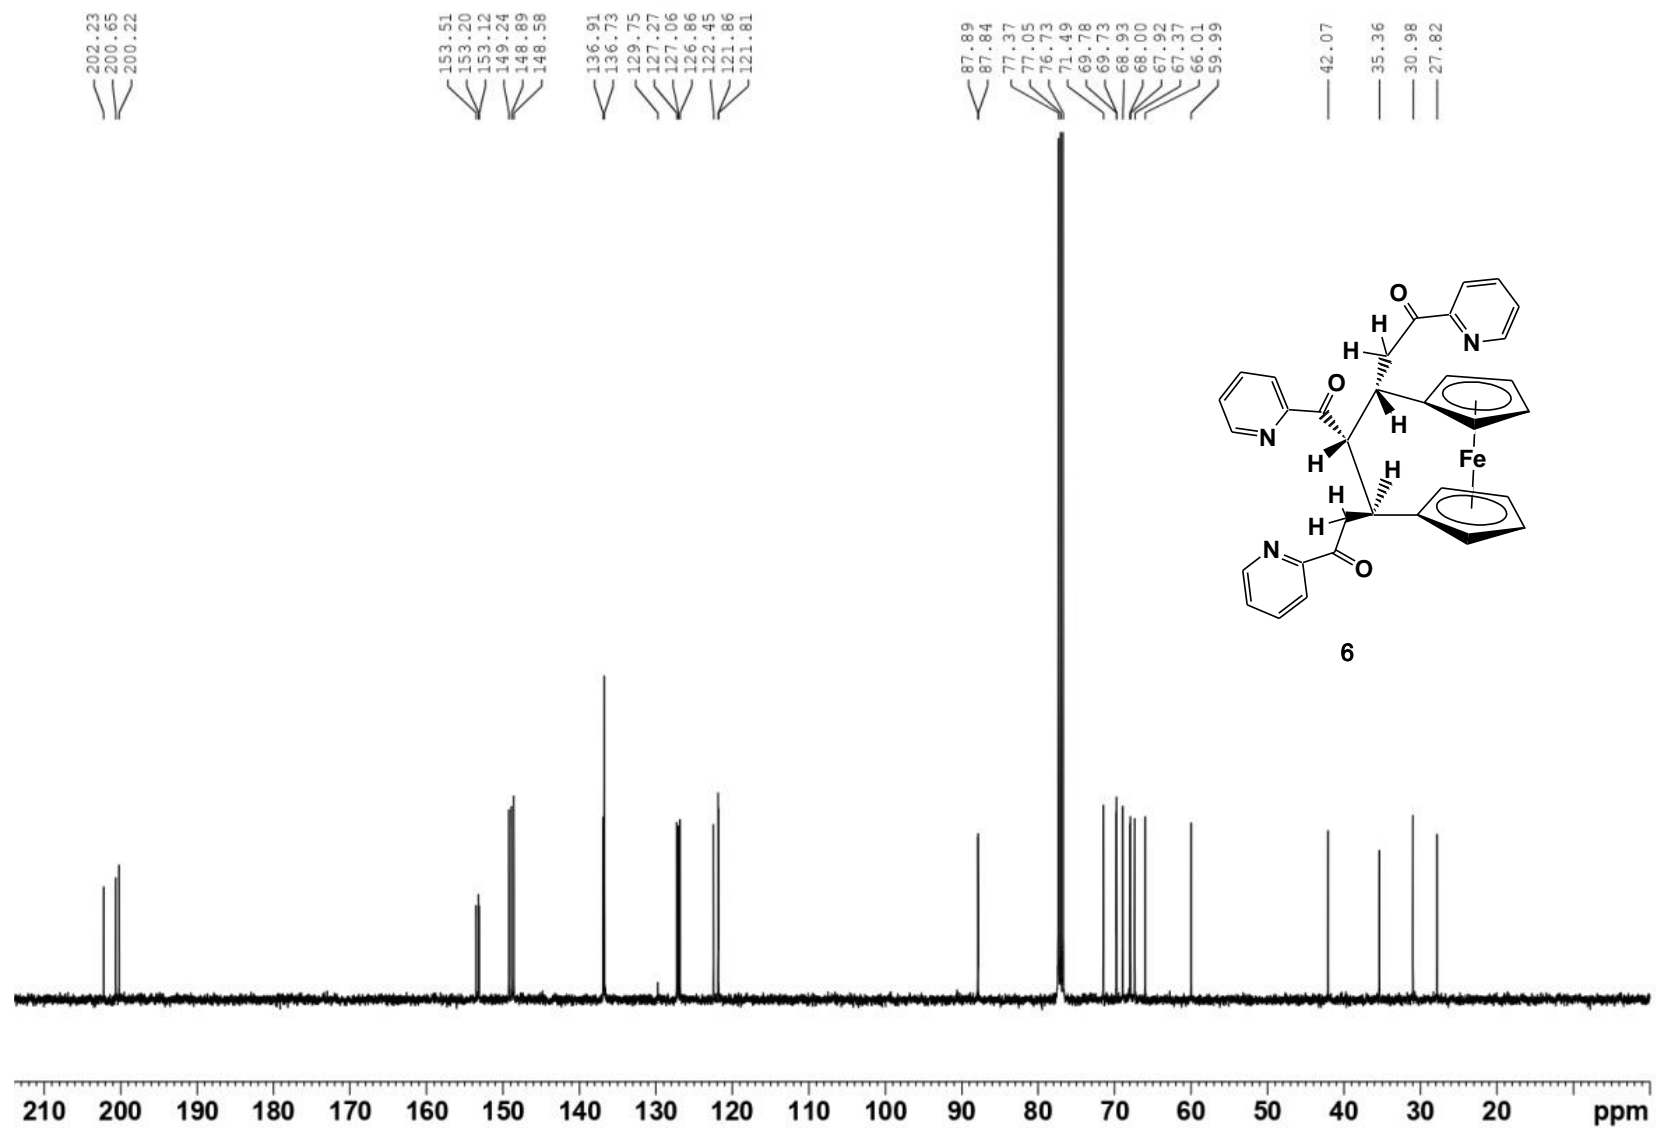

Figure S8:  $^{13}\text{C}$  NMR of compound 6 ( $\text{CDCl}_3$ , 100 MHz)

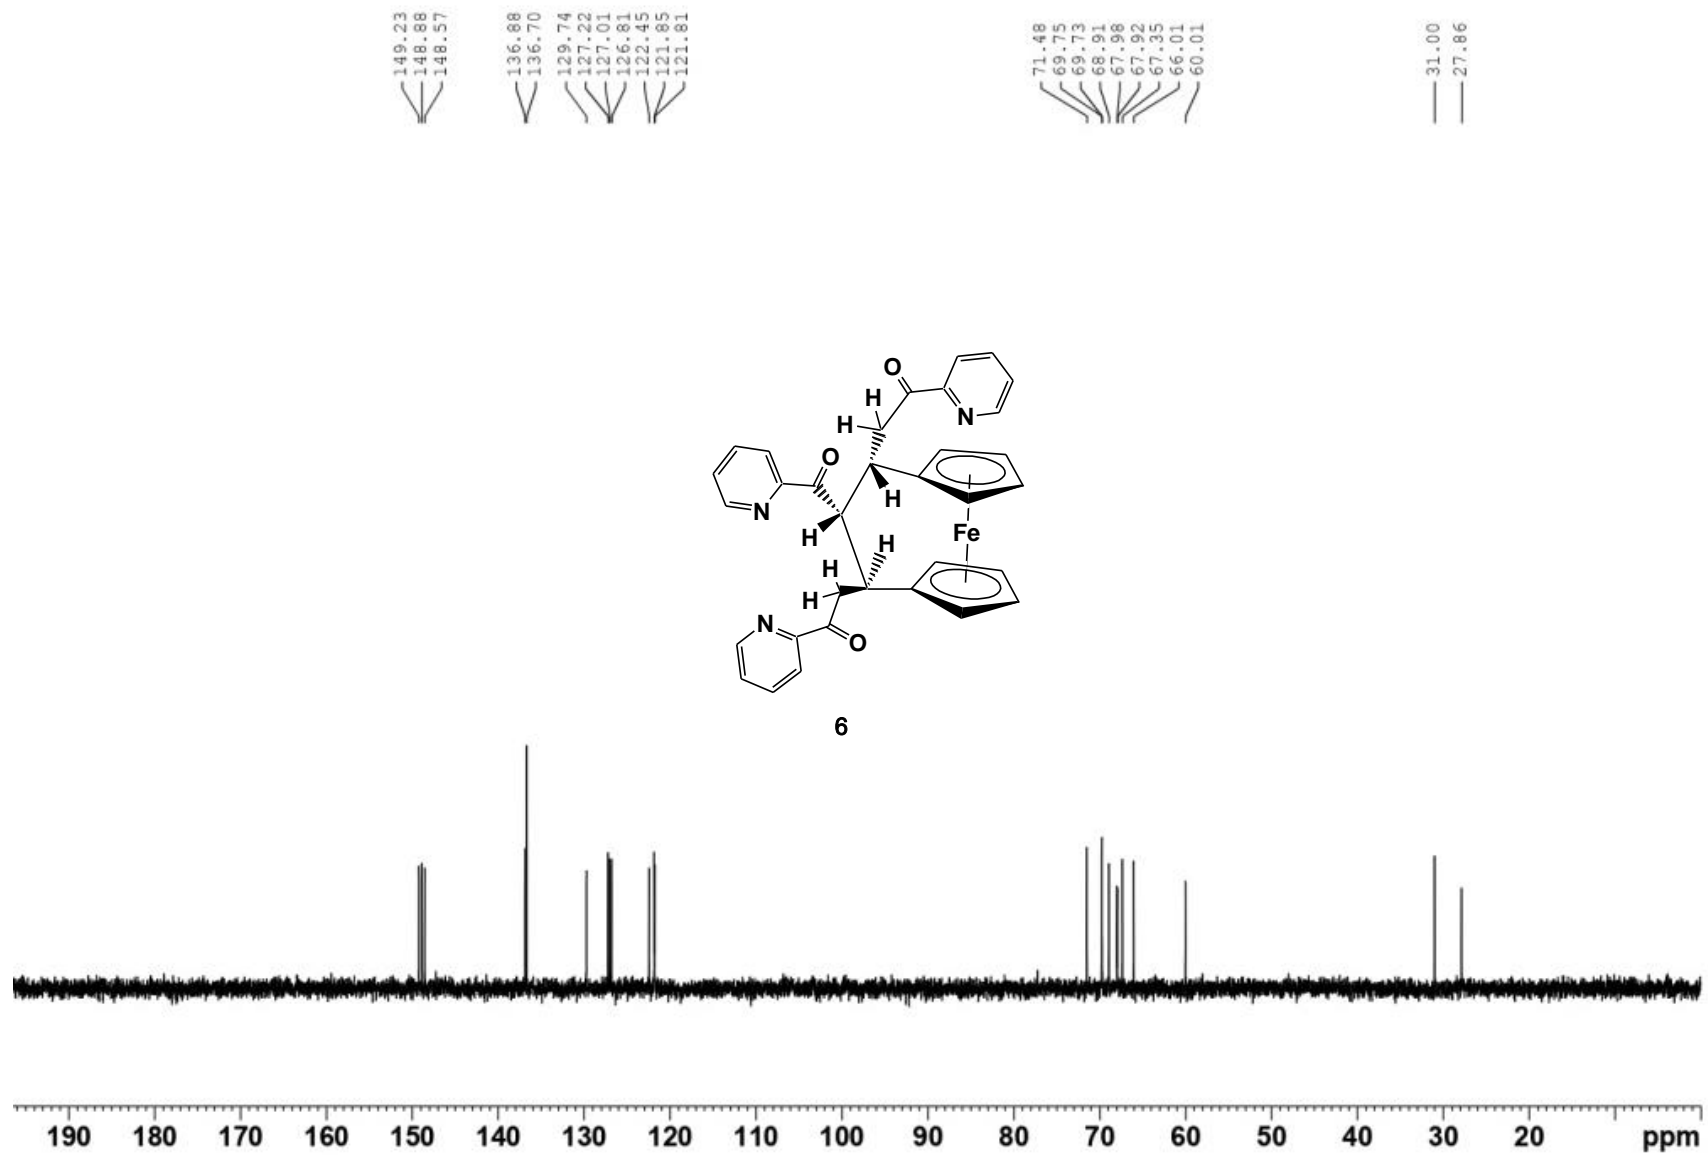

Figure S9: DEPT-90 NMR of compound 6 (CDCl<sub>3</sub>, 100 MHz)

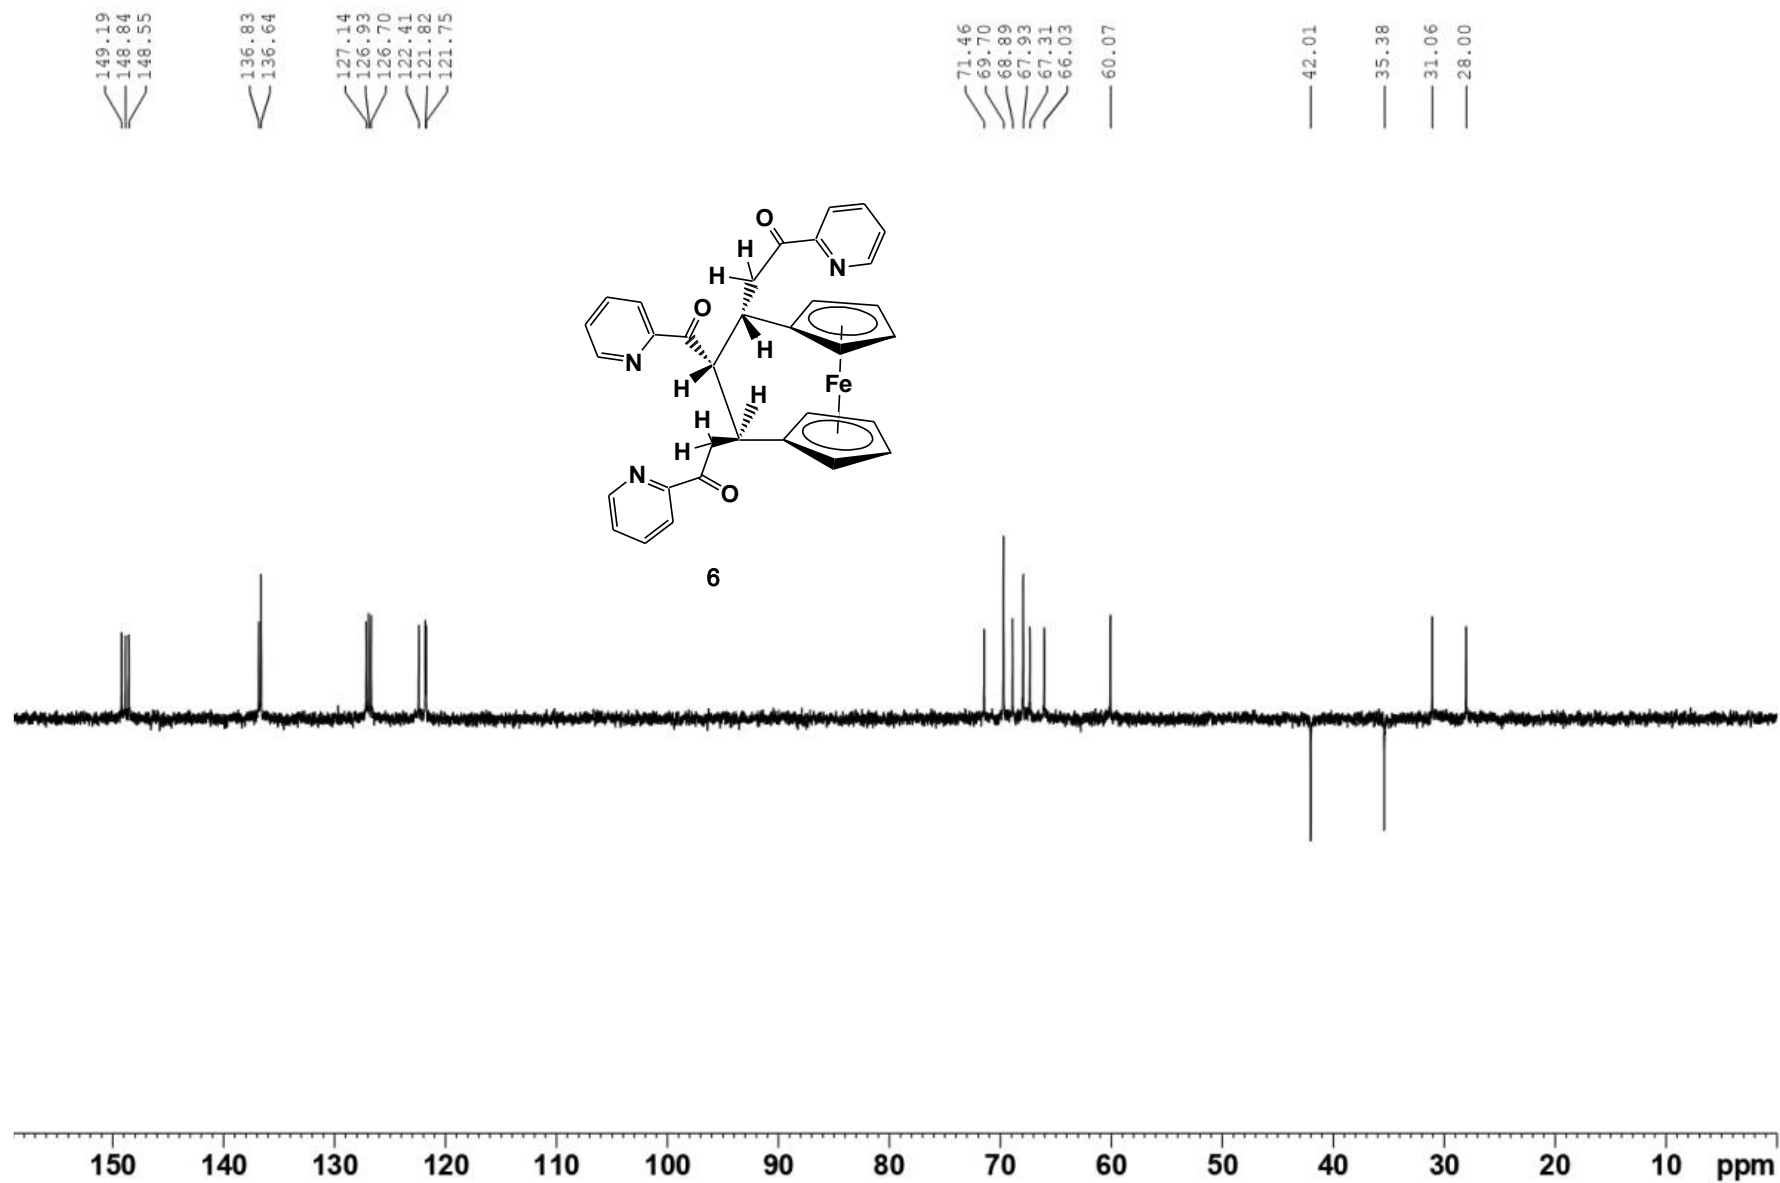

Figure S10: DEPT-135 NMR of compound 6 (CDCl<sub>3</sub>, 100 MHz)

SC  
SC-FC-DI-PY-Y1 89 (1.659) Cm (80:89-(69:78+88:89))

NIT Rourkela

1: TOF MS ES+  
5.11e7

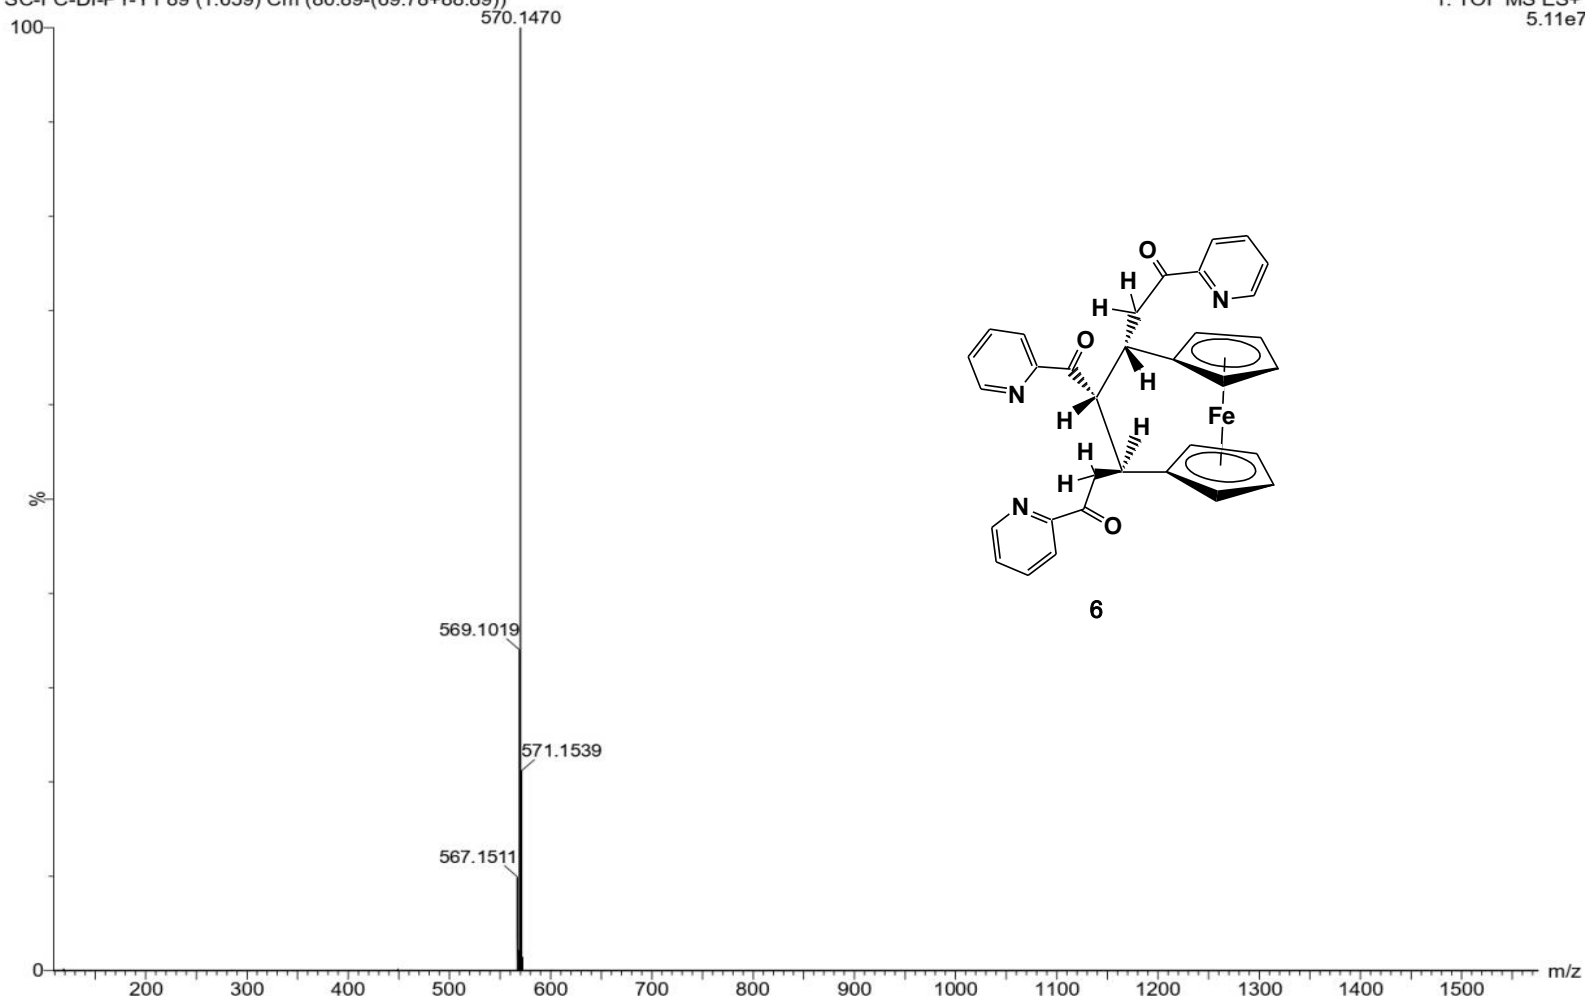

**Figure S11: HRMS of compound 6. (100 pmol/ $\mu$ L in MeCN (positive ion mode).**

Chemical formula:  $C_{33}H_{27}FeN_3O_3$ , Mol. Wt: 569.43 ; Observed m/z = 570.1470  $[M + H]^+$  .

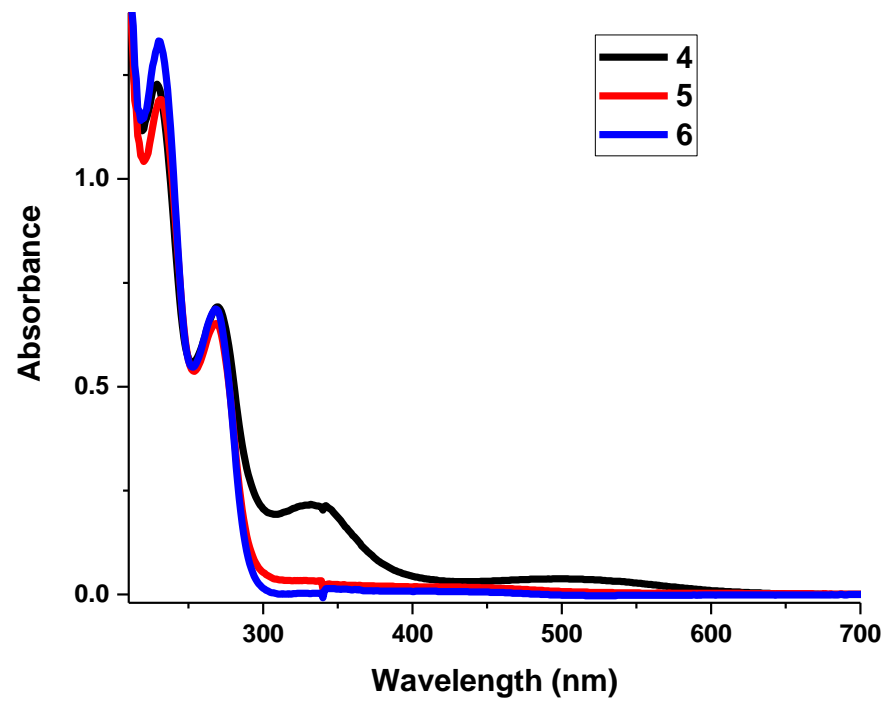

Figure S12: UV-Visible Spectra of 4-6

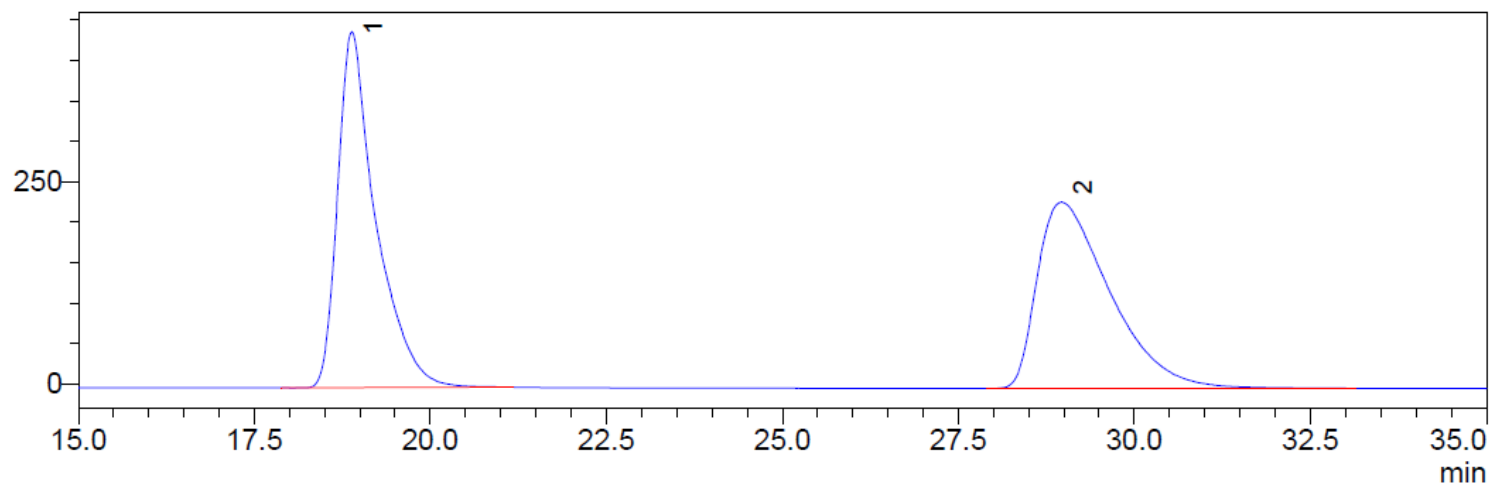

PDA Ch1 254nm

| Peak# | Ret. Time | Area%  |
|-------|-----------|--------|
| 1     | 18.89     | 50.04  |
| 2     | 28.97     | 49.96  |
| Total |           | 100.00 |

**Figure S13: Chiral HPLC of 6 showing 1R,3R and 1S,3S enantiomers**

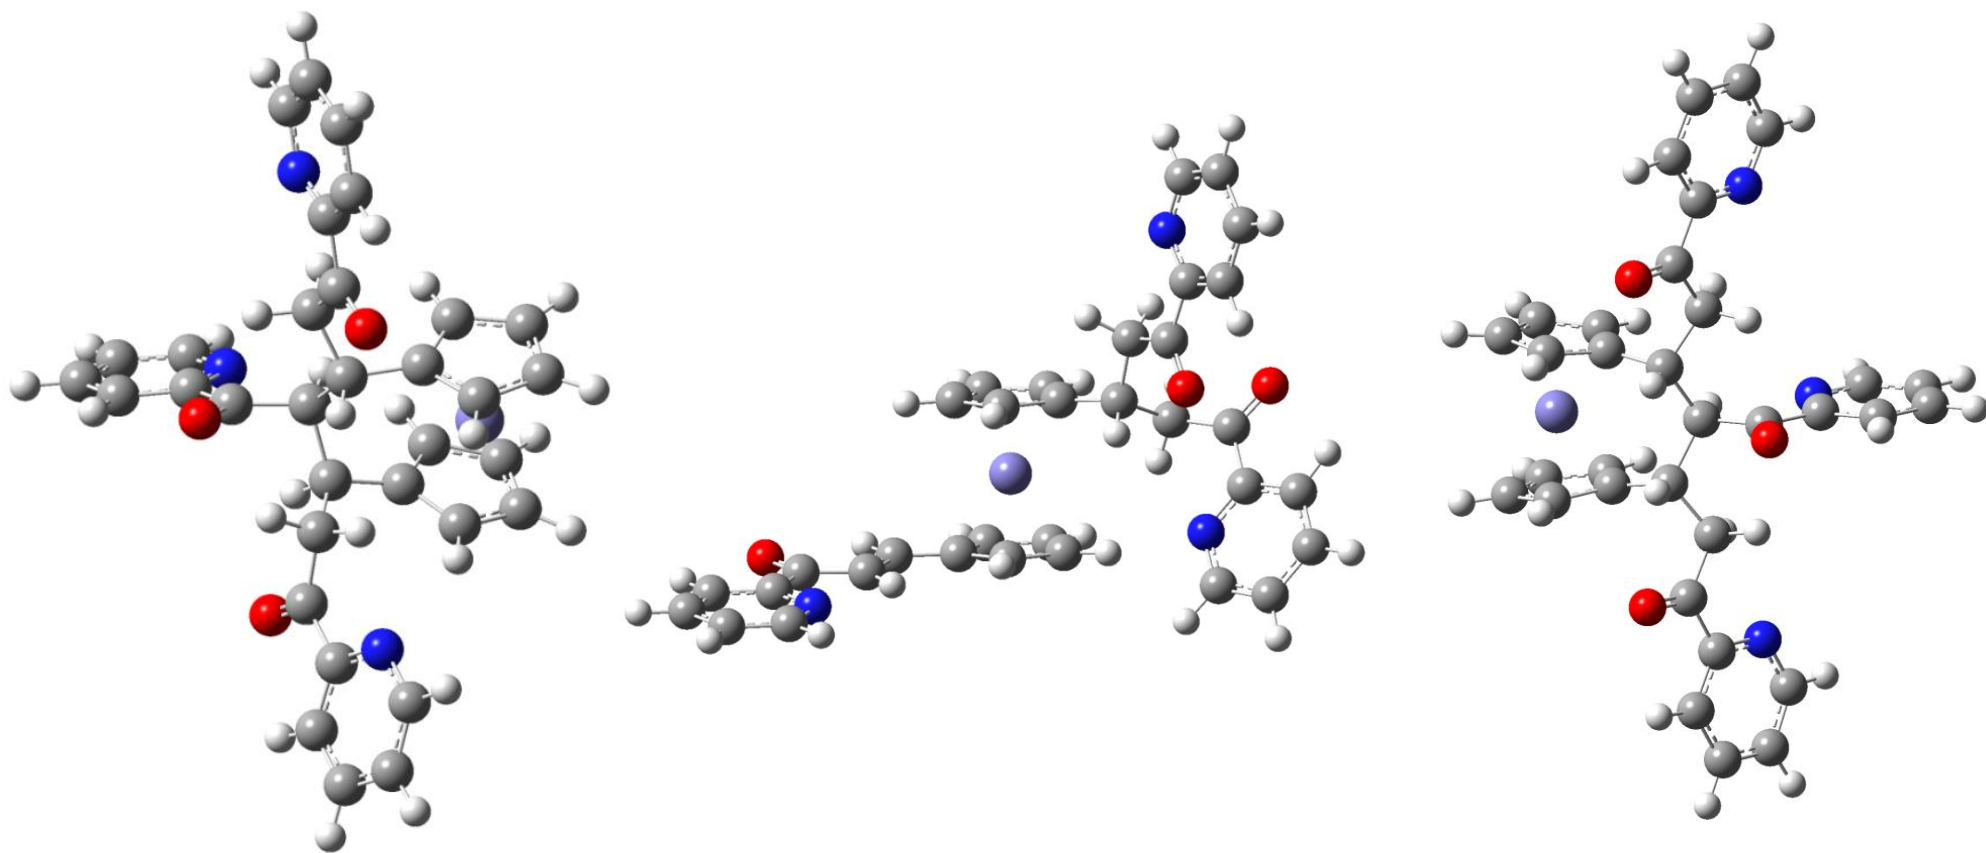

**Figure S14 : Optimized geometry of 6 (- 48622.268518209 eV), 4 (- 48622.287660337 eV) and 5 (- 48622.207742644 eV)**



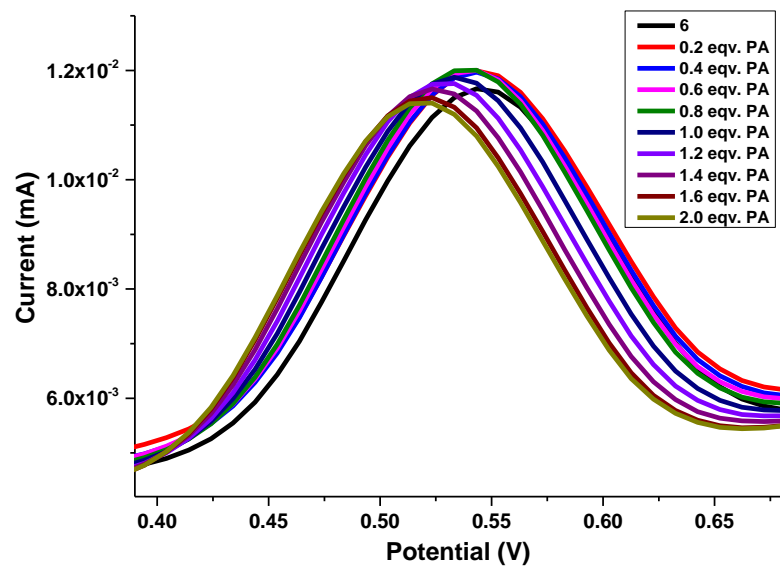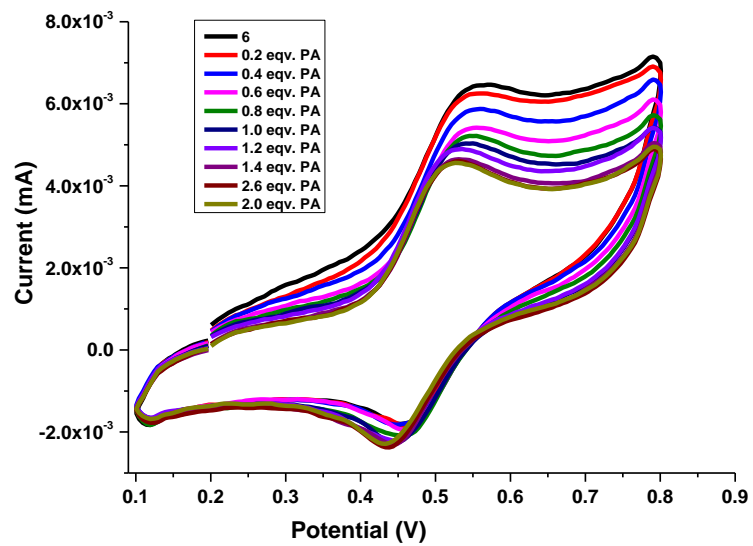

Figure S15: DPV and CV of 6 on gradual addition of Picric acid (PA)

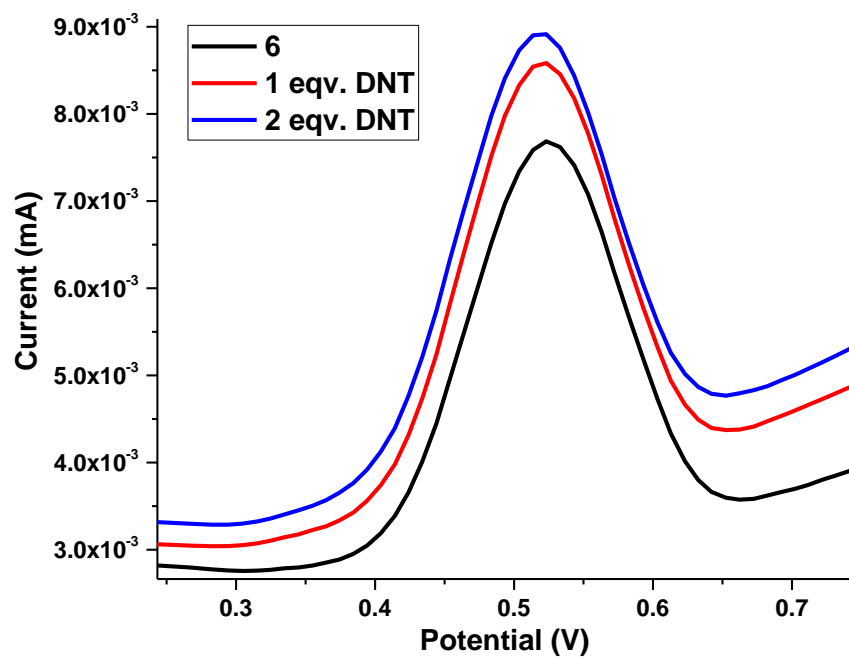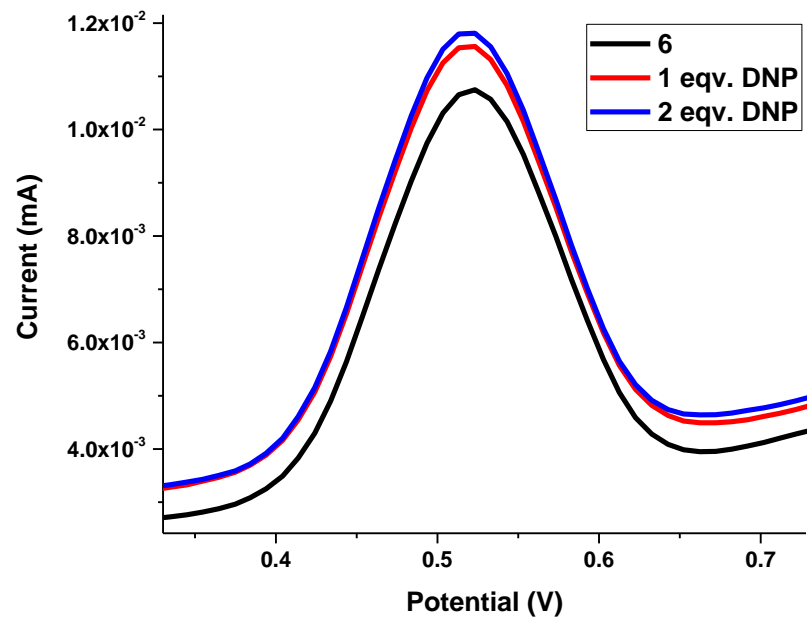

Figure S16: DPV of 6 on gradual addition of dinitrotoluene (DNT) and dinitrophenol (DNP)

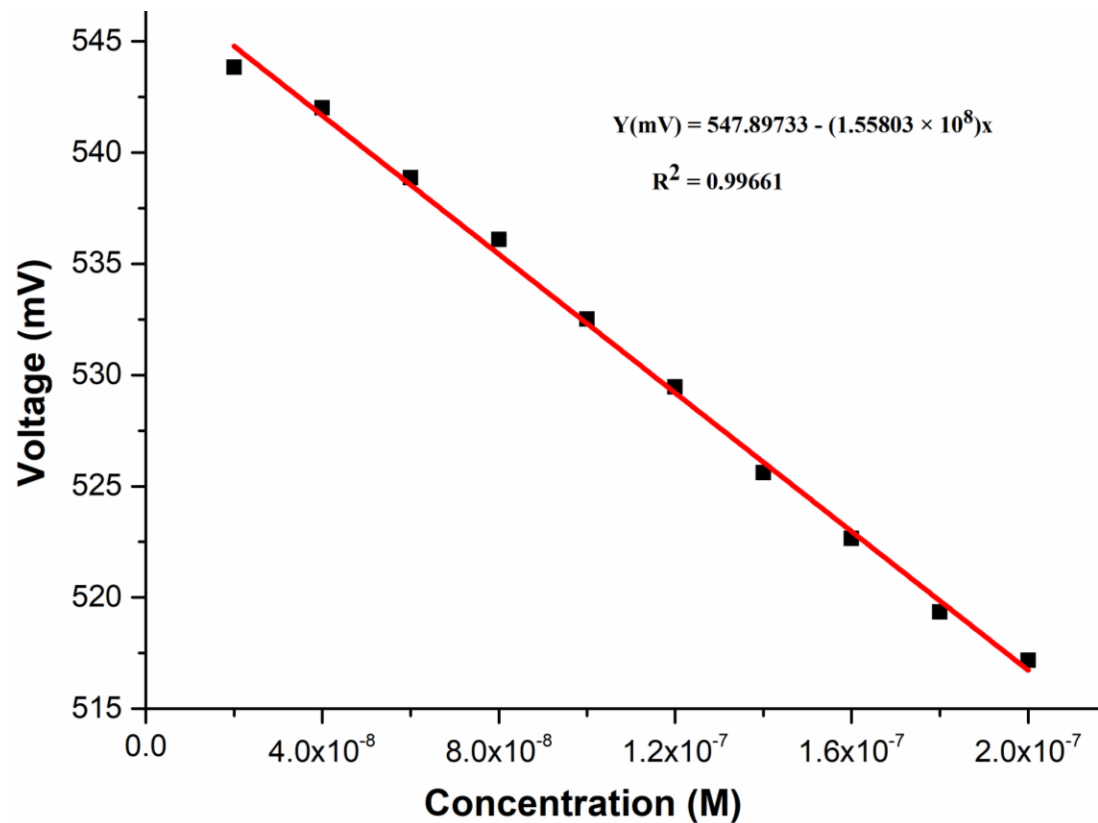

$$Y(\text{mV}) = 547.89733 - (1.55803 \times 10^8)x$$

$$R^2 = 0.99661$$

Limit of detection (LOD) =  $3 \times \text{SD} / \text{Slope}$

SD = Standard deviation of the blank

$$\text{LOD} = 1.914 \times 10^{-8} \text{ M}$$

$$\text{LOD} = 9.635 \text{ ng / mL}$$

Figure S17: Calculation of LOD using DPV data [6.PA]

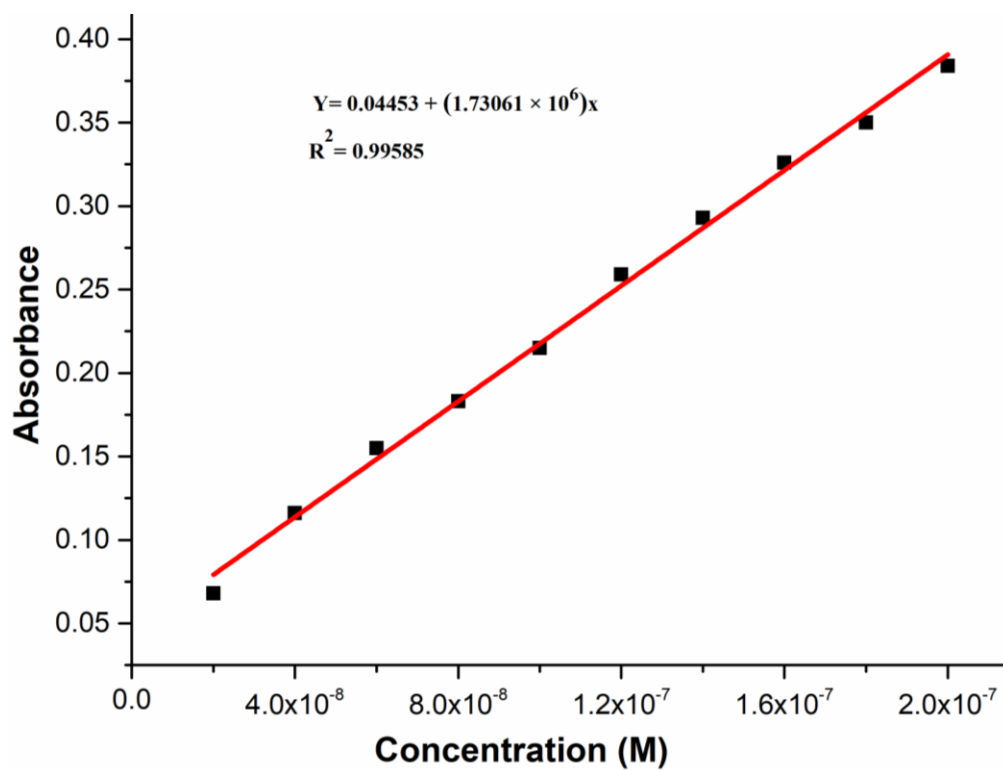

$$Y = 0.04453 + (1.73061 \times 10^6)x$$

$$R^2 = 0.99585$$

Limit of detection (LOD) = 3 × SD / Slope

SD = Standard deviation of the blank

$$\text{LOD} = 1.790 \times 10^{-8} \text{ M}$$

$$\text{LOD} = 9.011 \text{ ng / mL}$$

Figure S18: Calculation of LOD using UV-Visible data of [6.PA]

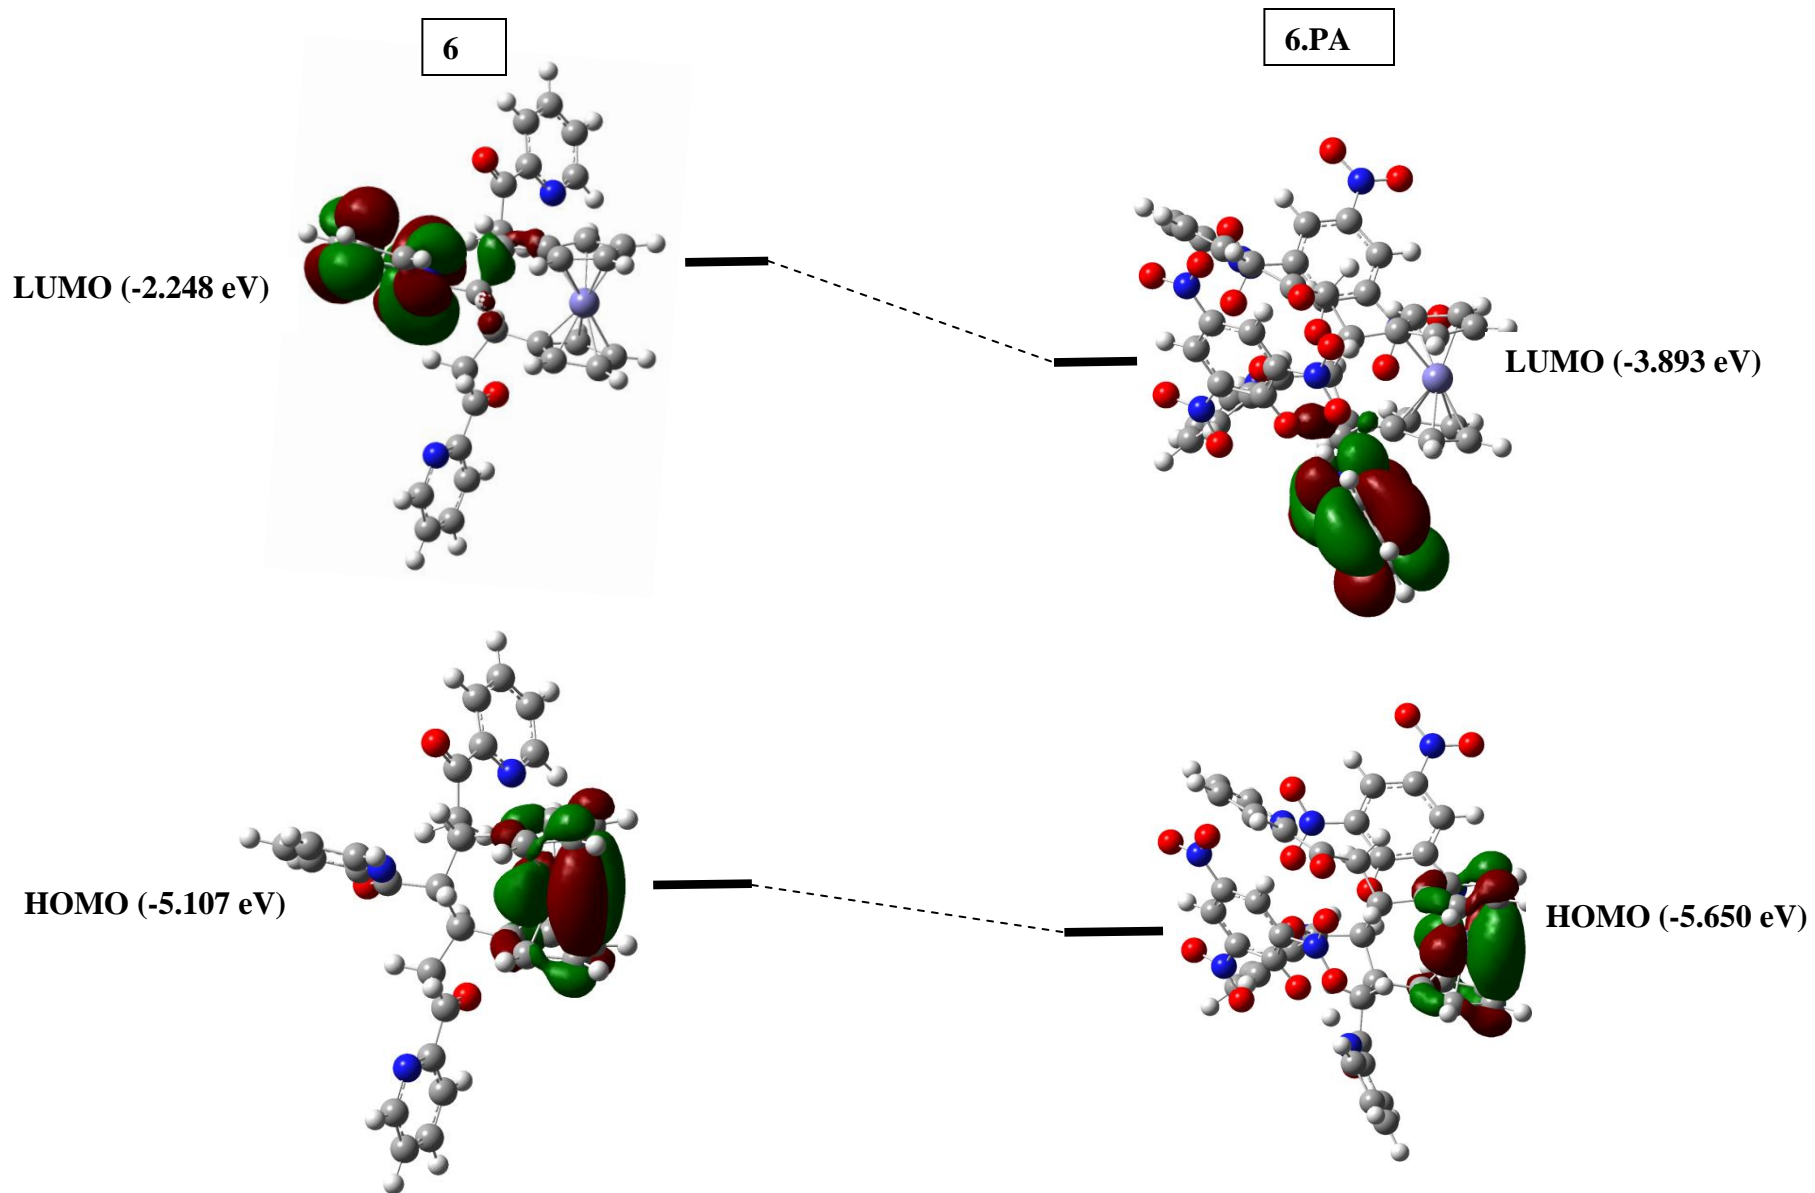

Figure S19: HOMO and LUMO for 6 and [6.PA]

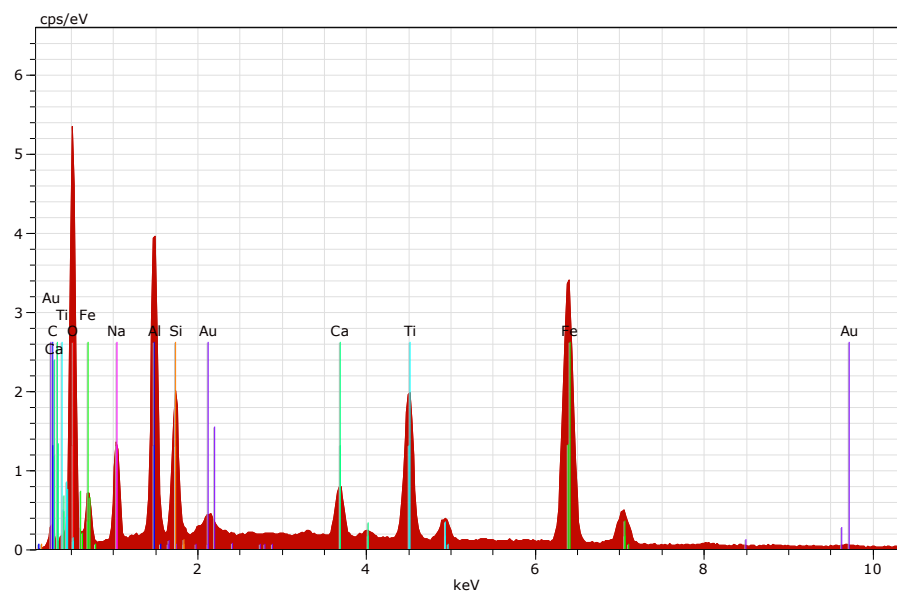

| El     | AN | Series   | unn.<br>[wt.%] | C norm.<br>[wt.%] | C Atom.<br>[at.%] | C Error (1 Sigma)<br>[wt.%] |
|--------|----|----------|----------------|-------------------|-------------------|-----------------------------|
| O      | 8  | K-series | 29.30          | 36.44             | 55.39             | 3.69                        |
| Fe     | 26 | K-series | 21.37          | 26.58             | 11.58             | 0.60                        |
| Al     | 13 | K-series | 8.92           | 11.10             | 10.00             | 0.46                        |
| Ti     | 22 | K-series | 7.73           | 9.62              | 4.89              | 0.25                        |
| Na     | 11 | K-series | 5.30           | 6.59              | 6.97              | 0.38                        |
| Si     | 14 | K-series | 3.38           | 4.21              | 3.64              | 0.18                        |
| C      | 6  | K-series | 2.39           | 2.97              | 6.01              | 0.61                        |
| Ca     | 20 | K-series | 2.01           | 2.50              | 1.52              | 0.09                        |
| Au     | 79 | L-series | 0.00           | 0.00              | 0.00              | 0.00                        |
| Total: |    |          | 80.40          | 100.00            | 100.00            |                             |

**Figure S20 : EDS of Redmud used**

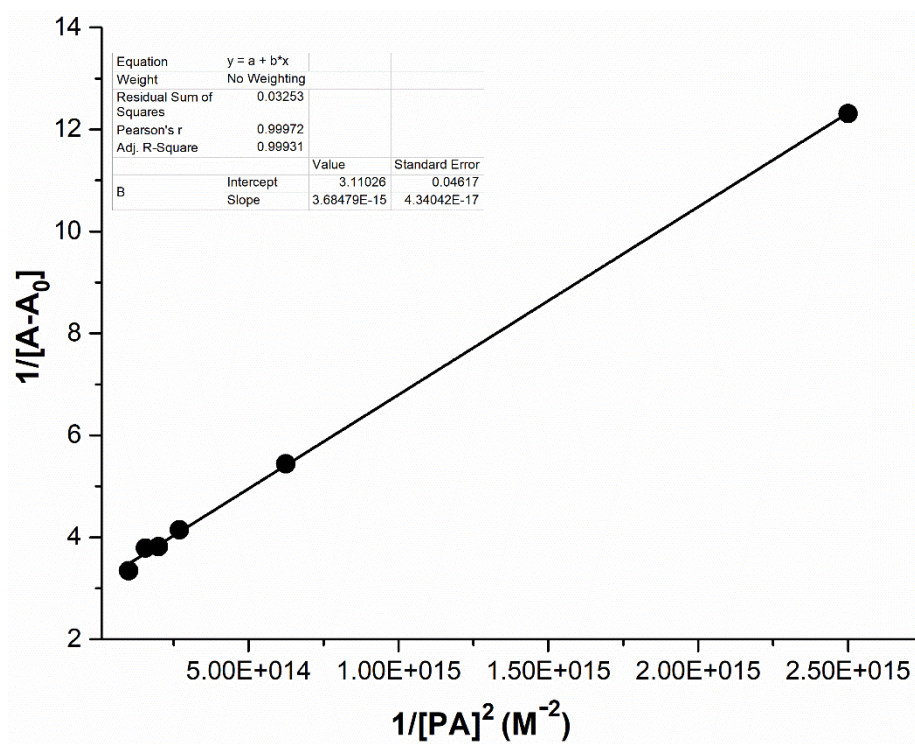

Figure S21: Benesi-Hildebrand plot (397 nm absorbance) of **6** assuming 1:2 stoichiometry for the association between **6** and [PA].
